# Supplementary material for: Overexpression of Mitochondrial Catalase within Adipose Tissue Does Not Confer Systemic Metabolic Protection against Diet-Induced Obesity
Source: MDPI journal article supplement (doi:10.3390/antiox12051137), 2023-05-22
Supplement: s1 [file s1]

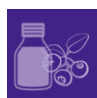

## Supplementary Materials

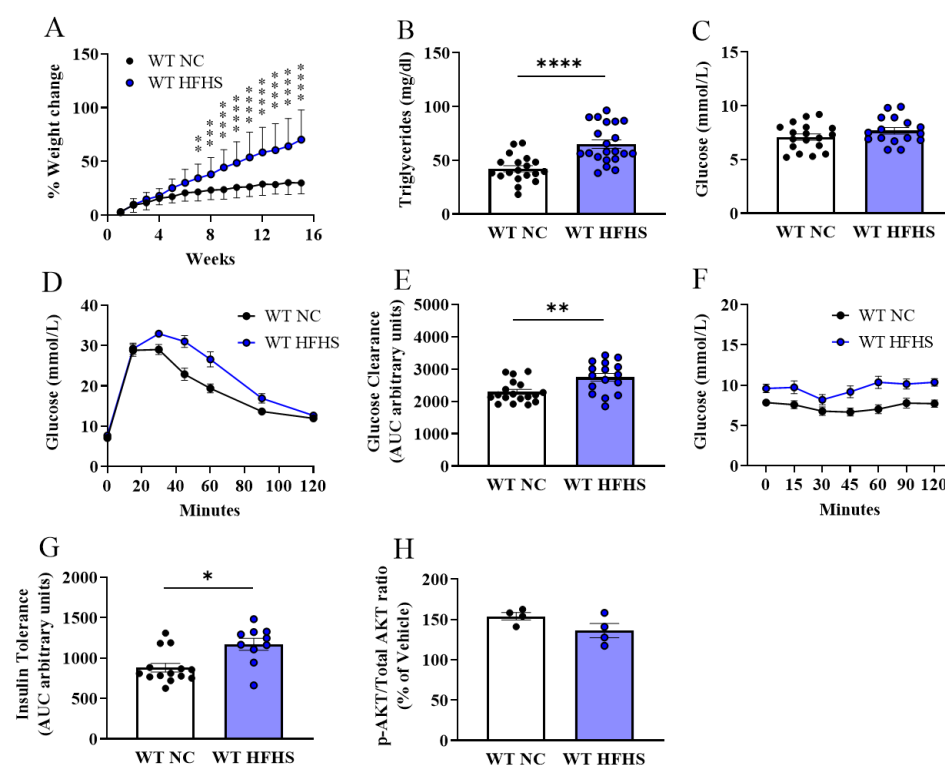

**Figure S1. Weight gain and metabolic parameters of WT mice under obesogenic stress.** A. Percentage weight change at endpoint from baseline. B. Plasma triglyceride levels. C. Fasting plasma glucose levels. D-E. Area under the curve analysis of IP-glucose tolerance test. F-G. Area under the curve analysis of IP-insulin tolerance test. H. Phosphorylated AKT/Total AKT ratio displayed as a percentage of vehicle control in insulin-stimulated adipose tissue. For statistical analysis, 2-way ANOVA was performed in A; Mann-Whitney test was performed in E and G; unpaired t-test was performed on B, C and H. Normality was assessed using the Shapiro-Wilk test. All values are represented as means with error bars representing SEM. \*  $p < 0.05$ , \*\*  $p < 0.01$ , \*\*\*\*  $p < 0.0001$ .

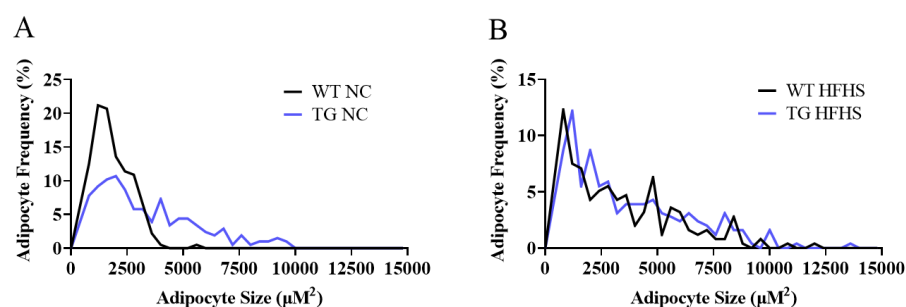

**Figure S2. Adipocyte size frequency histogram.** A. Frequency histogram of adipocytes by area ( $\mu\text{m}^2$ ) in WT vs AdipoQ-mCAT TG mice under physiological diet conditions. B. Frequency histogram of adipocytes by area ( $\mu\text{m}^2$ ) in WT vs AdipoQ-mCAT mice under obesogenic stress.

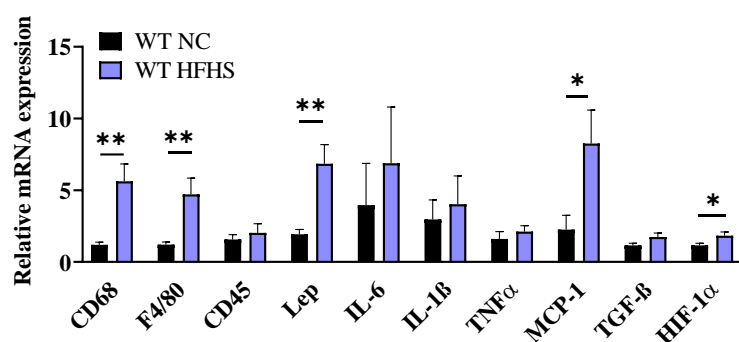

**Figure S3. Gene expression analysis of white adipose tissue of WT mice under obesogenic stress.** A. Quantitative PCR analysis of gene expression in white adipose tissue of WT mice fed NC diet versus HFHS diet ( $n = 9,10$  per group). For statistical analysis, unpaired t-tests or Mann-Whitney tests were performed. Normality was assessed using the Shapiro-Wilk test. All values are represented as means with error bars representing SEM. \*  $p < 0.05$ , \*\*  $p < 0.01$ .

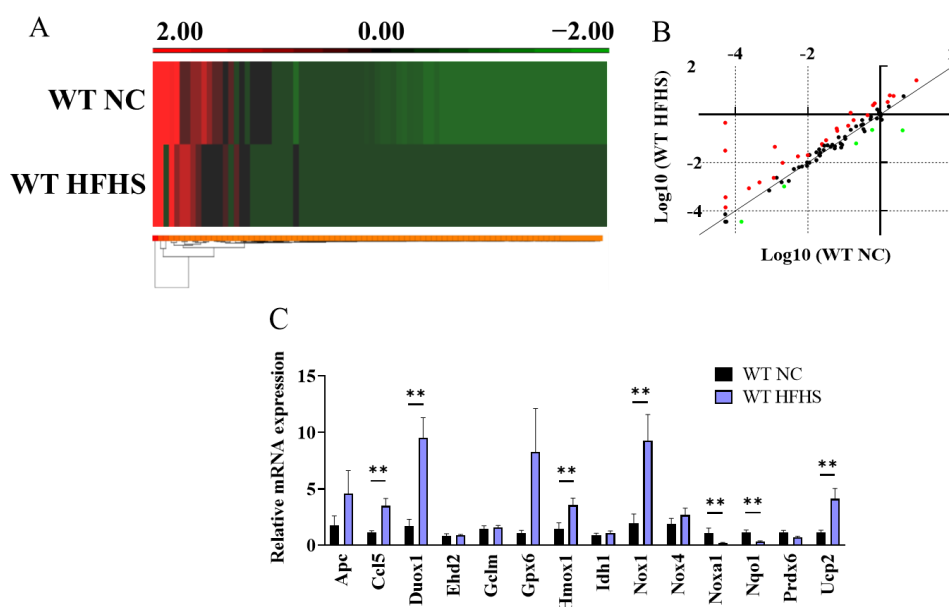

**Figure S4. Analysis of oxidative stress genes in adipose tissue of WT mice under conditions of obesogenic stress.** A. Gene expression heat map comparing oxidative stress genes in adipose tissue of WT mice after 16 weeks of HFHS diet compared to NC diet. B. Scatterplot representing differentially expressed genes in an oxidative stress qPCR panel. Red: Genes over-expressed 2-fold or more in WT HFHS vs WT NC mice; Green: Genes under-expressed 2-fold or more in WT HFHS vs WT NC mice. C. Differentially expressed genes were validated in adipose tissue using qPCR ( $n = 6-9$  per group). Normality was determined using Shapiro-Wilk test in B-D. Unpaired t-tests or Mann-Whitney tests were performed in C. All values are represented as means with error bars representing SEM. \*\*  $p < 0.01$ .

**Table S1.** Pre-designed qPCR primers.

| Primer Name | Catalogue Number | Manufacturer                    |
|-------------|------------------|---------------------------------|
| Mouse IL6   | M_Il6_1          | Sigma-Aldrich KicqStart Primers |
| Mouse IL1B  | M_Il1b_1         | Sigma-Aldrich KicqStart Primers |
| Mouse LEP   | M_Lep_1          | Sigma-Aldrich KicqStart Primers |
| Mouse MCP-1 | M_Ccl2_1         | Sigma-Aldrich KicqStart Primers |
| Mouse HIF1a | M_Hif1a_1        | Sigma-Aldrich KicqStart Primers |
| Mouse Duox1 | M_Duox1_1        | Sigma-Aldrich KicqStart Primers |
| Mouse Gpx5  | M_Gpx5_1         | Sigma-Aldrich KicqStart Primers |

|                |               |                                 |
|----------------|---------------|---------------------------------|
| Mouse Noxa1    | M_Noxa1_1     | Sigma-Aldrich KicqStart Primers |
| Mouse Nqo1     | M_Nqo1_1      | Sigma-Aldrich KicqStart Primers |
| Mouse Prdx6    | M_Prdx6_1     | Sigma-Aldrich KicqStart Primers |
| Human Catalase | Hs00156308_m1 | Thermo Fisher Taqman Assay      |
| Mouse GAPDH    | 4326317       | Thermo Fisher Taqman Assay      |

Table S2. qPCR primer sequences.

| Primer Name    | Forward Primer 5' -> 3' | Reverse Primer 5' -> 3' |
|----------------|-------------------------|-------------------------|
| Mouse CD68     | AGGACCGCTTATAGCCCAAG    | GGATGGCAGGAGAGTAACGG    |
| Mouse F4/80    | GTGACTCACCTTGTGGTCCT    | CAGACACTCATCAACATCTGCG  |
| Mouse CD45     | AGAAGTCTTTGTCACAGGGCA   | AAGAAGGGCATTCTCTGTTGTG  |
| Mouse TGFB1    | ACTGGAGTTGTACGGCAGTG    | GGGGCTGATCCCGTTGATT     |
| Mouse TNFA     | CCCACGTCGTAGCAAACCA     | ACAAGGTACAACCCATCGGC    |
| Mouse PPIA     | CATTCTGGACCCAAAACG      | GGCAAATGCTGGACCAAAC     |
| Mouse Ccl5     | ATATGGCTCGGACACCACTC    | CTTCGAGTGACAAACACGACTG  |
| Mouse Gclm     | ACAATGACCCGAAAGAAGTGC   | GAGCTGGAGTTAAGAGCCCC    |
| Mouse Gpx6     | GTCACGGTTTTGGGCTTTCC    | GCCTGGACGCACATACTTGA    |
| Mouse Hmox1    | GCCCCACCAAGTTCAAACAG    | GCTCCTCAAACAGCTCAATGT   |
| Mouse Nox1     | GTTTCTCTCCCGAAGGACCTCT  | GGCCAAGGCAGTCCCAAGAA    |
| Mouse Nox4     | CCAAATGTTGGGCGATTGTGT   | AGGATGAGGCTGCAGTTGAG    |
| Mouse Apc      | CCCTATGTACGCCTTCCTGC    | CTACCCTTGGACCTGCCAGA    |
| Mouse Ehd2     | TCGTTGTGGACCCAGAGAAG    | GGCGCACATAAACCTGTTG     |
| Mouse Idh1     | TTCCGAGCGAAGGTTGTGG     | TTTACTTCAATAACCCGGCTCAC |
| Mouse Ucp2     | CCTCCCTTGCCACTTCACTT    | GGAAGGCATGAACCCCTTGTA   |
| Mouse Hsp90ab1 | AGATTCCAATAACCGACGCC    | TGCTCTTTGCTCTCACCAGT    |
| Mouse GAPDH    | TACGGGTGCACGTAGCTCA     | AATACGGCCAAATCCGTTTAC   |

Table S3. Differentially expressed (&gt;2-fold) oxidative stress genes in adipose tissue of AdipoQ-mCAT mice versus Wild-type.

| Gene Symbol   | Refseq ID    | Gene Name                                            | Fold Regulation (vs Wild-type) |
|---------------|--------------|------------------------------------------------------|--------------------------------|
| <i>Alb</i>    | NM_009654    | Albumin                                              | -79.35                         |
| <i>Aox1</i>   | NM_009676    | Aldehyde oxidase 1                                   | 2.78                           |
| <i>Apc</i>    | NM_007462    | Adenomatosis polyposis coli                          | 2.25                           |
| <i>Ccl5</i>   | NM_013653    | Chemokine (C-C motif) ligand 5                       | 3.37                           |
| <i>Duox1</i>  | NM_001099297 | Dual oxidase 1                                       | 3.36                           |
| <i>Ehd2</i>   | NM_153068    | EH-domain containing 2                               | 2.13                           |
| <i>Gclm</i>   | NM_008129    | Glutamate-cysteine ligase, modifier subunit          | 2.03                           |
| <i>Gpx5</i>   | NM_010343    | Glutathione peroxidase 5                             | 37222.98                       |
| <i>Gpx6</i>   | NM_145451    | Glutathione peroxidase 6                             | 241.36                         |
| <i>Hmox1</i>  | NM_010442    | Heme oxygenase (decycling) 1                         | -2.84                          |
| <i>Hspa1a</i> | NM_010479    | Heat shock protein 1A                                | 3.41                           |
| <i>Idh1</i>   | NM_010497    | Isocitrate dehydrogenase 1 (NADP+), soluble          | 4354.68                        |
| <i>Ift172</i> | NM_026298    | Intraflagellar transport 172 homolog (Chlamydomonas) | 708.21                         |
| <i>Mb</i>     | NM_013593    | Myoglobin                                            | 3.17                           |
| <i>Mpo</i>    | NM_010824    | Myeloperoxidase                                      | 3.87                           |
| <i>Ncf2</i>   | NM_010877    | Neutrophil cytosolic factor 2                        | 3.41                           |
| <i>Nox1</i>   | NM_172203    | NADPH oxidase 1                                      | 4.68                           |
| <i>Noxa1</i>  | NM_172204    | NADPH oxidase activator 1                            | 2.57                           |

|              |           |                                                      |        |
|--------------|-----------|------------------------------------------------------|--------|
| <i>Nqo1</i>  | NM_008706 | NAD(P)H dehydrogenase, quinone 1                     | 5.85   |
| <i>Prdx6</i> | NM_007453 | Peroxiredoxin 6                                      | 2.22   |
| <i>Prnp</i>  | NM_011170 | Prion protein                                        | 2.31   |
| <i>Ptgs1</i> | NM_008969 | Prostaglandin-endoperoxide synthase 1                | 2.89   |
| <i>Ptgs2</i> | NM_011198 | Prostaglandin-endoperoxide synthase 2                | 319.82 |
| <i>Srxn1</i> | NM_029688 | Sulfiredoxin 1 homolog (S. cerevisiae)               | −2.84  |
| <i>Ucp2</i>  | NM_011671 | Uncoupling protein 2 (mitochondrial, proton carrier) | 2.72   |
| <i>Vim</i>   | NM_011701 | Vimentin                                             | 2.72   |

**Table S4.** Differentially expressed (>2-fold) oxidative stress genes in adipose tissue of Wild-type mice fed NC vs HFHS diet.

| Gene Symbol      | Refseq ID    | Gene Name                                                    | Fold Regulation (vs Wild-type NC) |
|------------------|--------------|--------------------------------------------------------------|-----------------------------------|
| <i>Alb</i>       | NM_009654    | Albumin                                                      | −18.87                            |
| <i>Aox1</i>      | NM_009676    | Aldehyde oxidase 1                                           | 2.43                              |
| <i>Ccl5</i>      | NM_013653    | Chemokine (C-C motif) ligand 5                               | 3.41                              |
| <i>Ctsb</i>      | NM_007798    | Cathepsin B                                                  | 4.08                              |
| <i>Cyba</i>      | NM_007806    | Cytochrome b-245, alpha polypeptide                          | 4.14                              |
| <i>Cygb</i>      | NM_030206    | Cytoglobin                                                   | 2.13                              |
| <i>Duox1</i>     | NM_001099297 | Dual oxidase 1                                               | 3.28                              |
| <i>Ehd2</i>      | NM_153068    | EH-domain containing 2                                       | 3.18                              |
| <i>Epx</i>       | NM_007946    | Eosinophil peroxidase                                        | −4.21                             |
| <i>Gpx1</i>      | NM_008160    | Glutathione peroxidase 1                                     | 2.04                              |
| <i>Gpx7</i>      | NM_024198    | Glutathione peroxidase 7                                     | 2.06                              |
| <i>Gstp1</i>     | NM_013541    | Glutathione S-transferase, pi 1                              | −2.64                             |
| <i>Idh1</i>      | NM_010497    | Isocitrate dehydrogenase 1 (NADP+), soluble                  | 8689.38                           |
| <i>Ift172</i>    | NM_026298    | Intraflagellar transport 172 homolog (Chlamydomonas)         | 604.75                            |
| <i>Mpo</i>       | NM_010824    | Myeloperoxidase                                              | 6.84                              |
| <i>Ncf2</i>      | NM_010877    | Neutrophil cytosolic factor 2                                | 2.68                              |
| <i>Ngb</i>       | NM_022414    | Neuroglobin                                                  | −2.17                             |
| <i>Nox1</i>      | NM_172203    | NADPH oxidase 1                                              | 2.64                              |
| <i>Nox4</i>      | NM_001285833 | NADPH oxidase 4                                              | 4.86                              |
| <i>Prnp</i>      | NM_011170    | Prion protein                                                | 2.61                              |
| <i>Ptgs2</i>     | NM_011198    | Prostaglandin-endoperoxide synthase 2                        | 37.03                             |
| <i>Recql4</i>    | NM_058214    | RecQ protein-like 4                                          | 3.65                              |
| <i>Scd1</i>      | NM_009127    | Stearoyl-Coenzyme A desaturase 1                             | 2.62                              |
| <i>Serpinb1b</i> | NM_173052    | Serine (or cysteine) peptidase inhibitor, clade B, member 1b | 2.05                              |
| <i>Sod3</i>      | NM_011435    | Superoxide dismutase 3, extracellular                        | 2.09                              |
| <i>Srxn1</i>     | NM_029688    | Sulfiredoxin 1 homolog (S. cerevisiae)                       | −3.43                             |
| <i>Ucp2</i>      | NM_011671    | Uncoupling protein 2 (mitochondrial, proton carrier)         | 7.72                              |
| <i>Vim</i>       | NM_011701    | Vimentin                                                     | 3.85                              |

**Table S5.** Differentially expressed (>2-fold) oxidative stress genes in adipose tissue of AdipoQ-mCAT HFHS mice versus Wild-type HFHS.

| Gene Symbol | Refseq ID | Gene Name                      | Fold Regulation (vs Wild-type) |
|-------------|-----------|--------------------------------|--------------------------------|
| <i>Ccl5</i> | NM_013653 | Chemokine (C-C motif) ligand 5 | 3.55                           |

---

|              |              |                                                      |        |
|--------------|--------------|------------------------------------------------------|--------|
| <i>Il19</i>  | NM_001009940 | Interleukin 19                                       | 2.01   |
| <i>Lpo</i>   | NM_080420    | Lactoperoxidase                                      | 2.05   |
| <i>Mb</i>    | NM_013593    | Myoglobin                                            | 140.79 |
| <i>Mpo</i>   | NM_010824    | Myeloperoxidase                                      | 2.73   |
| <i>Ucp3</i>  | NM_009464    | Uncoupling protein 3 (mitochondrial, proton carrier) | 2.03   |
| <i>Alb</i>   | NM_009654    | Albumin                                              | −7.39  |
| <i>Ngb</i>   | NM_022414    | Neuroglobin                                          | −2.53  |
| <i>Ptgs2</i> | NM_011198    | Prostaglandin-endoperoxide synthase 2                | −12.67 |

---
